# Supplementary material for: Development of antioxidant gliadin particle stabilized Pickering high internal phase emulsions (HIPEs) as oral delivery systems and the in vitro digestion fate
Source: Royal Society of Chemistry journal article supplement (doi:10.1039/c7fo01400g), 2017-12-18
Supplement: c7fo01400g1.pdf [file c7fo01400g1.pdf]

**Figure 1S**

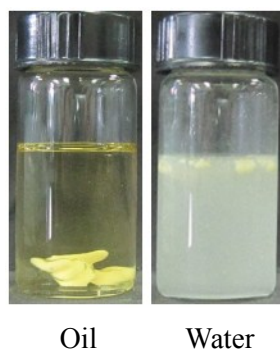

**Fig. 1S** The dispersion of the emulsions in the oil (left) and water (right)

**Figure 2S**

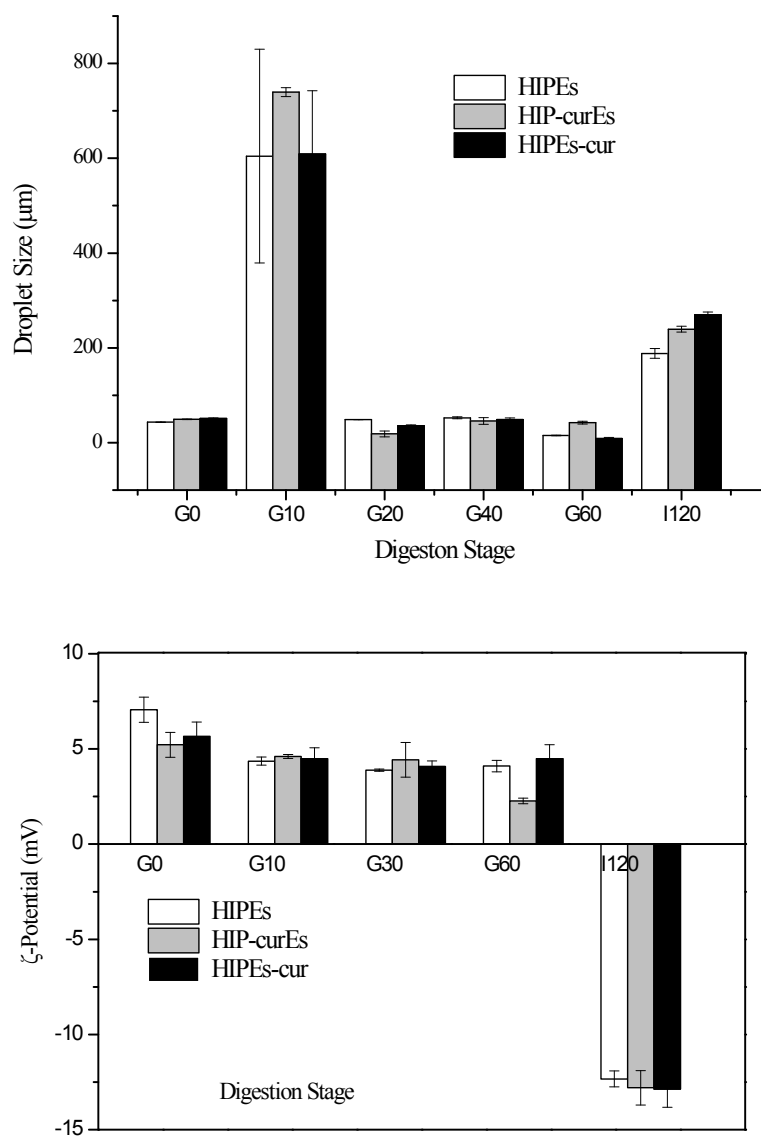

**Fig. 2S** Evolution of droplet size and zeta potential of HYPEs during the simulated GI digestion

**Figure 3S**

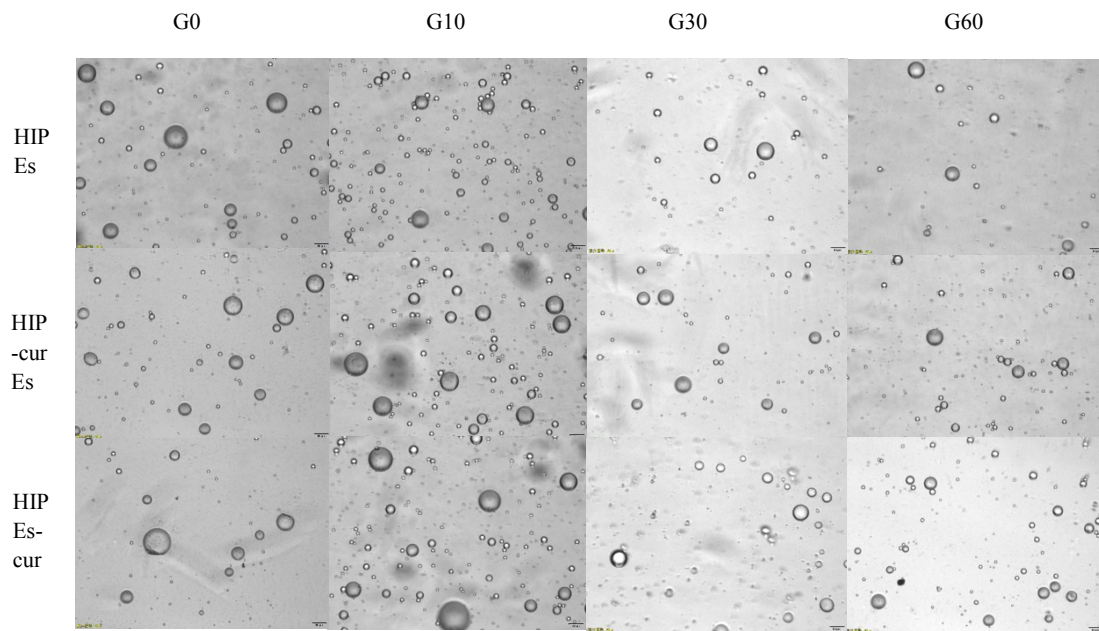

**Fig. 3S** Microstructural change during simulated gastric digestion.

## Table

**Table 1S** The size and zeta potentials of GCCP and GCCP-Cur

| Samples      | Particle size(nm) | Zeta potential(mV) |
|--------------|-------------------|--------------------|
| GCCP         | 190.1±6.8         | 52.71±1.60         |
| GCCP-5.0     | 564.7±15.4        | 14.43±1.06         |
| GCCP-Cur     | 342.5±13.6        | 61.43±1.53         |
| GCCP-Cur-5.0 | 1718.5±35.4       | 18.87±0.81         |

**Table 2S****Table 2S** Effect of storage time on the  $D_{4,3}$  of Pickering HIPEs

| Emulsion types | NEW                     | 1 Months                 |
|----------------|-------------------------|--------------------------|
| HIPEs          | 49.30±0.44 <sup>d</sup> | 44.87±0.12 <sup>b</sup>  |
| HIP-curEs      | 43.37±0.15 <sup>a</sup> | 43.97±0.49 <sup>ab</sup> |
| HIPEs-cur      | 51.33±0.52 <sup>e</sup> | 46.77±0.30 <sup>c</sup>  |
